# Supplementary material
Source: PubMed Central journal article supplement (PMC3278298)
Supplement: supp_mcr325_mcr325supp.pdf [file supp_mcr325_mcr325supp.pdf]

## SUPPLEMENTARY DATA

TABLE S1. Survival at all four field sites of plants from the LT and M13 populations, outcross (O) and three generations of selfing (S1, S2, and S3), in comparison to the number planted.

| Home site        | Population | Generation | Number planted | Survived |
|------------------|------------|------------|----------------|----------|
| Home             | LT         | O          | 233            | 160      |
|                  | LT         | S1         | 228            | 133      |
|                  | LT         | S2         | 232            | 141      |
|                  | LT         | S3         | 46             | 19       |
|                  | M13        | O          | 234            | 64       |
|                  | M13        | S1         | 220            | 58       |
|                  | M13        | S2         | 196            | 55       |
|                  | M13        | S3         | 187            | 45       |
| Local occupied   | LT         | O          | 232            | 78       |
|                  | LT         | S1         | 227            | 62       |
|                  | LT         | S2         | 230            | 61       |
|                  | LT         | S3         | 56             | 12       |
|                  | M13        | O          | 226            | 121      |
|                  | M13        | S1         | 225            | 129      |
|                  | M13        | S2         | 195            | 104      |
|                  | M13        | S3         | 175            | 81       |
| Native novel     | LT         | O          | 232            | 67       |
|                  | LT         | S1         | 230            | 83       |
|                  | LT         | S2         | 227            | 75       |
|                  | LT         | S3         | 52             | 18       |
|                  | M13        | O          | 232            | 102      |
|                  | M13        | S1         | 230            | 83       |
|                  | M13        | S2         | 215            | 75       |
|                  | M13        | S3         | 185            | 65       |
| Non-native novel | LT         | O          | 280            | 97       |
|                  | LT         | S1         | 274            | 65       |
|                  | LT         | S2         | 251            | 55       |
|                  | LT         | S3         | 7              | 4        |
|                  | M13        | O          | 278            | 74       |
|                  | M13        | S1         | 271            | 61       |
|                  | M13        | S2         | 213            | 45       |
|                  | M13        | S3         | 178            | 38       |

TABLE S2. Means (and coefficients of variation) for each trait, population and cross-type for stem diameter, plant height and above-ground biomass. The cross-types are: O, outcross progeny; S1, progeny from the first generation of selfing; and S2, progeny from the second generation of selfing.

|                    | LT planting site |                |                | M13 planting site |                |                | Native novel planting site |                |                | Non-native novel planting site |                 |                 |
|--------------------|------------------|----------------|----------------|-------------------|----------------|----------------|----------------------------|----------------|----------------|--------------------------------|-----------------|-----------------|
|                    | O                | S1             | S2             | O                 | S1             | S2             | O                          | S1             | S2             | O                              | S1              | S2              |
| Stem diameter (cm) |                  |                |                |                   |                |                |                            |                |                |                                |                 |                 |
| Land Trust (LT)    | 0.74<br>(58.5)   | 0.64<br>(63.1) | 0.54<br>(53.3) | 1.2<br>(69.8)     | 0.8<br>(59.9)  | 0.72<br>(51.4) | 1.46<br>(84.6)             | 1.01<br>(69.6) | 0.98<br>(67.8) | 0.29<br>(58)                   | 0.26<br>(65.6)  | 0.21<br>(53.3)  |
| M13                | 0.76<br>(67.5)   | 0.59<br>(74.8) | 0.65<br>(57.8) | 0.95<br>(66.2)    | 0.76<br>(67.8) | 0.93<br>(67.9) | 1.11<br>(70.2)             | 1.24<br>(88)   | 0.87<br>(78)   | 0.29<br>(88.6)                 | 0.23<br>(66.5)  | 0.22<br>(71.6)  |
| Height (cm)        |                  |                |                |                   |                |                |                            |                |                |                                |                 |                 |
| Land Trust (LT)    | 13.8<br>(53.4)   | 11.4<br>(55.1) | 8.6<br>(60.6)  | 15.6<br>(59.5)    | 11.3<br>(58.2) | 10.3<br>(65.0) | 23.9<br>(53.8)             | 18.4<br>(58.7) | 18.0<br>(67.3) | 7.44<br>(70.12)                | 6.93<br>(60.8)  | 4.3<br>(67.2)   |
| M13                | 12.9<br>(58.0)   | 9.84<br>(62)   | 10.6<br>(55.4) | 13.3<br>(64.0)    | 10.6<br>(62.3) | 11.1<br>(68.1) | 19.9<br>(60.3)             | 18.25<br>(62)  | 14.0<br>(70.4) | 7.33<br>(74)                   | 5.26<br>(72.3)  | 4.91<br>(70.9)  |
| Biomass (g)        |                  |                |                |                   |                |                |                            |                |                |                                |                 |                 |
| Land Trust (LT)    | 0.08<br>(124)    | 0.06<br>(136)  | 0.04<br>(134)  | 0.16<br>(150)     | 0.06<br>(150)  | 0.05<br>(133)  | 0.26<br>(172)              | 0.10<br>(146)  | 0.11<br>(141)  | 0.005<br>(119)                 | 0.004<br>(98.3) | 0.002<br>(87.7) |
| M13                | 0.07<br>(126)    | 0.04<br>(129)  | 0.05<br>(108)  | 0.11<br>(138)     | 0.07<br>(169)  | 0.07<br>(172)  | 0.17<br>(214)              | 0.21<br>(326)  | 0.08<br>(164)  | 0.005<br>(115)                 | 0.003<br>(132)  | 0.002<br>(104)  |

TABLE S3. Plasticity measured by family mean differences between pairs of planting sites. Values are means and standard errors of plasticity. Negative values are when the home site is smaller than the other site; positive values are when plants in the home site have larger values. (a) Variation in measures of plasticity when examined between native and novel sites. (b) Variation in plasticity across cross-types: O, outcross progeny; S1, progeny from the first generation of selfing; and S2, progeny from the second generation of selfing. (c) Variation in measures of plasticity between populations: LT, Land Trust population; and M13, Carr *et al.* population.

(a) Site

|                          | Home to reciprocal occupied native site | Home to native novel site | Home to non-native novel site |
|--------------------------|-----------------------------------------|---------------------------|-------------------------------|
| Stem diameter plasticity | -0.04 (0.05)                            | -0.29 (0.06)              | 0.50 (0.03)                   |
| Height plasticity        | -0.81 (0.55)                            | -6.76 (0.75)              | 5.31 (0.52)                   |

(b) Cross type

|                          | O            | S1            | S2           |
|--------------------------|--------------|---------------|--------------|
| Stem diameter plasticity | 0.02 (0.06)  | -0.009 (0.06) | 0.09 (0.05)  |
| Height plasticity        | -0.79 (0.82) | -1.07 (0.78)  | -1.34 (0.74) |

(c) Population

|                          | LT           | M13          |
|--------------------------|--------------|--------------|
| Stem diameter plasticity | -0.12 (0.04) | 0.19 (0.05)  |
| Height plasticity        | -1.88 (0.62) | -0.17 (0.66) |
